# Supplementary material
Source: publisher site journal article supplement (https://www.dovepress.com/article/361809)
Supplement: Supplementary file 1 [file get_supplementary_file.php]

**Supplemental Figures**


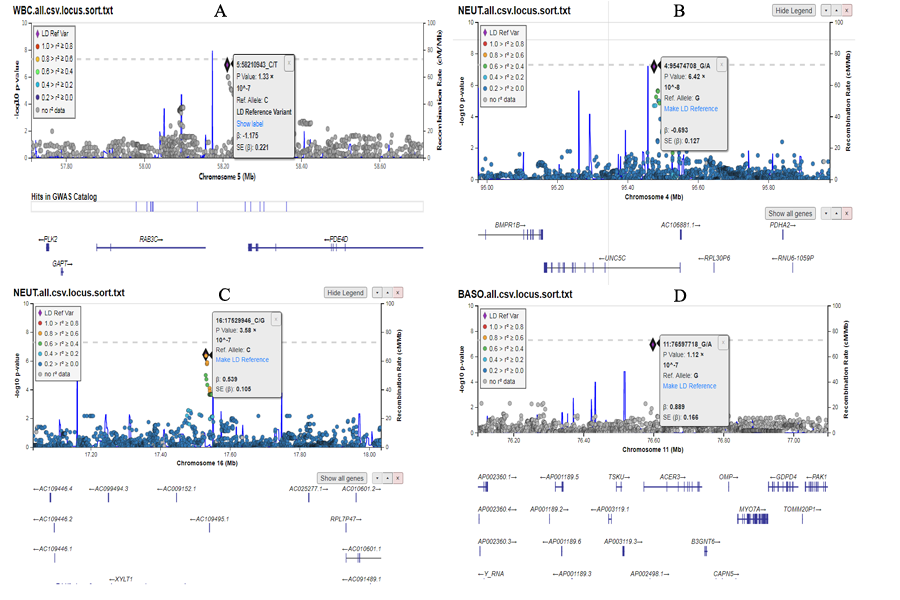


**Supplemental figure 1** A map of the TOP SNPs associated with phenotypic indicators related to white blood cell on different chromosomes. (A) WBC: rs2964173 (LINC02101-PLK2); (B) NEUT: rs78843681 (UNC5C); (C) NEUT: rs7195345 (XYLT1-NPIPA7); (D) BASO: rs144735144 (EMSY-LRRC32).


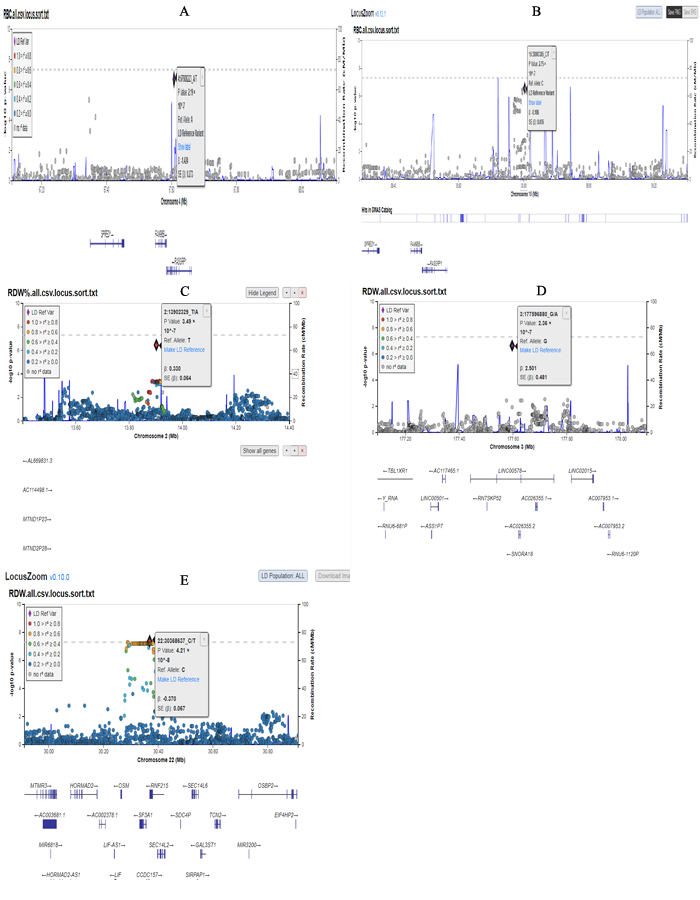


**Supplemental figure 2** A map of the TOP SNPs associated with phenotypic indicators related to red blood cells on different chromosomes. (A) RBC: rs191799779 (STAP1); (B) RBC: rs2912390 (C15orf53-C15orf54); (C) RDW%: rs118103202 (LOC100506474-LINC00276); (D) RDW: rs1875098 (LINC00578); (E) RDW: rs35289401 (CCDC157).


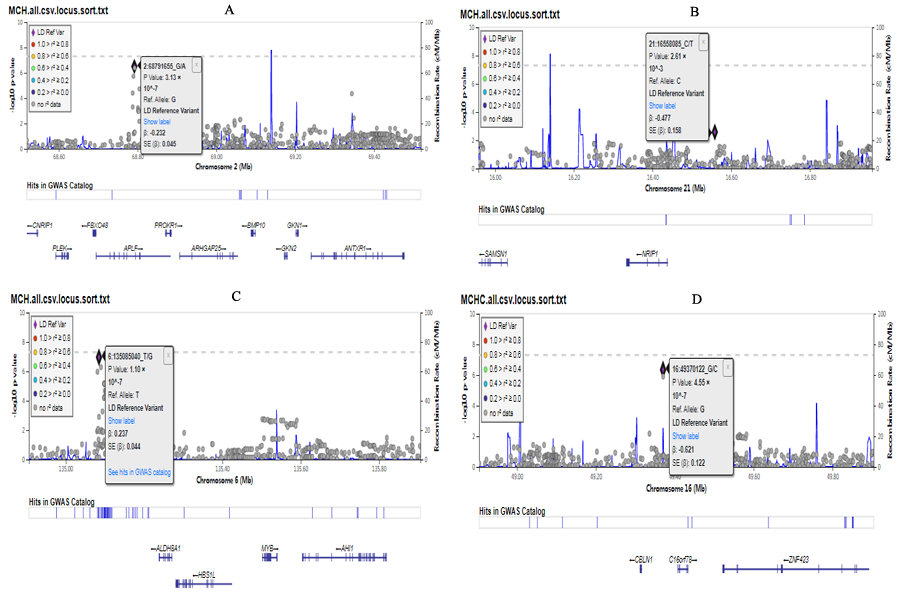


**Supplemental figure 3** A map of the TOP SNPs associated with phenotypic indicators related to hemoglobin on different chromosomes. (A) MCH: rs10208669 (ARHGAP25); (B) MCH: rs12482879 (NRIP1-USP25); (C) MCH: rs1331309 (HBS1L-MYB); (D) MCHC: rs148933121 (CBLN1-C16orf78)
